# Supplementary material
Source: Springer Nature journal article supplement (https://www.springermedizin.de/resource/supplementary/12885_2010_2757_MOESM4_ESM.pdf/9461814)

**1-2. Construct a correlation network from 26 TMA markers to identify “WGCNA patient groups”**

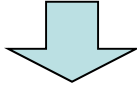

**3. Relate WGCNA groups to clinical variables**



**4. Identify a subset of markers that approximate the WGCNA groups = “WGCNA\* patient groups”**

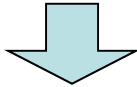

**5. Conduct a conventional Cox regression analysis of the 26 TMA markers = “COX patient groups”**

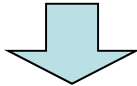

**6. Compare WGCNA, WGCNA\* and COX groups to clinical variables in bivariate and multivariate models**

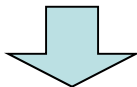

**7. Validate WGCNA\* and COX groups in independent gene expression data sets**

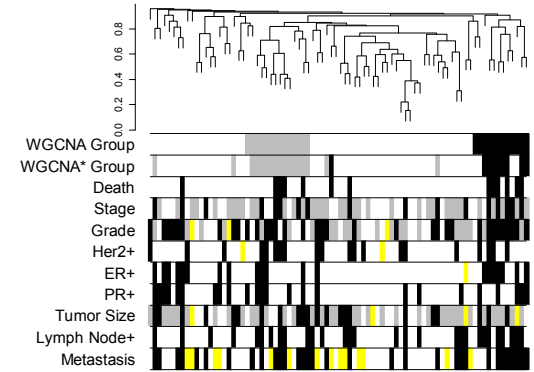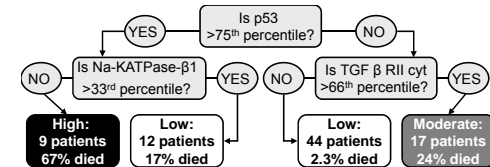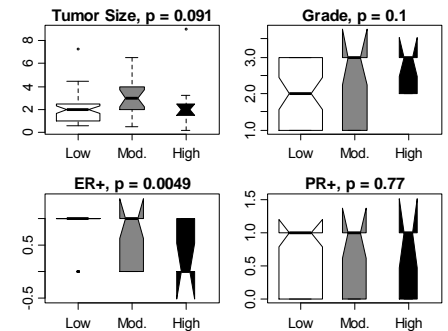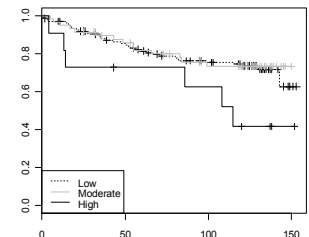

Supplement: MOESM4 [file 9461814]
